# Supplementary material for: Molecular engineering of complexation between RNA and biodegradable cationic gemini surfactants: role of the hydrophobic chain length
Source: Royal Society of Chemistry journal article supplement (doi:10.1039/d1me00147g), 2022-01-01
Supplement: d1me00147g1.pdf [file d1me00147g1.pdf]

## **Electronic Supplementary Information**

### **Molecular Engineering of Complexation Between RNA and Biodegradable Cationic Gemini Surfactants: Role of the Hydrophobic Chain Length**

Mohd. Akram<sup>1,\*</sup>, Hira Lal<sup>1</sup>, Sonam Shakya<sup>1</sup>, Rohit Varshney<sup>2</sup>, Kabir-ud-Din<sup>3</sup>

<sup>1</sup>*Department of Chemistry, Aligarh Muslim University, Aligarh, India-202002*

<sup>2</sup>*Habitat Centre, Institute of Nano Science and Technology, Phase-10, Sector-64, Mohali, Punjab, India-160062*

<sup>3</sup>*Department of Chemistry, College of Natural and Computational Sciences, Arba Minch University, Arba Minch, Ethiopia*

\*Corresponding author.

*E-mail address:* [drmohdakram@rediffmail.com](mailto:drmohdakram@rediffmail.com) (M. Akram)

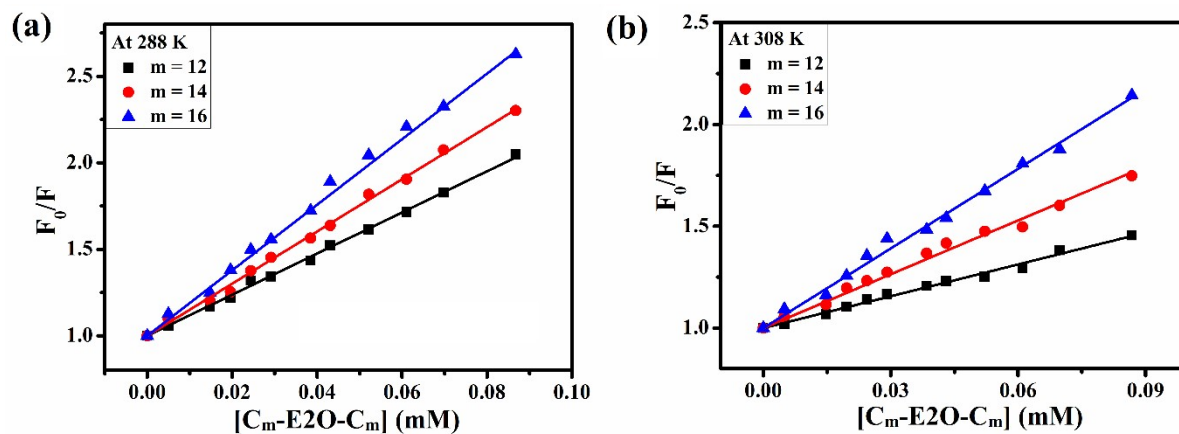

**Figure S1.** Stern-Volmer plots for quenching of intrinsic fluorescence of EB-RNA complexes in the presence of  $C_m$ -E2O- $C_m$  gemini surfactants ( $m = 12, 14$  and  $16$ ) in Tris-HCl buffer (pH = 7.4) at (a) 288 K and (b) 308 K.

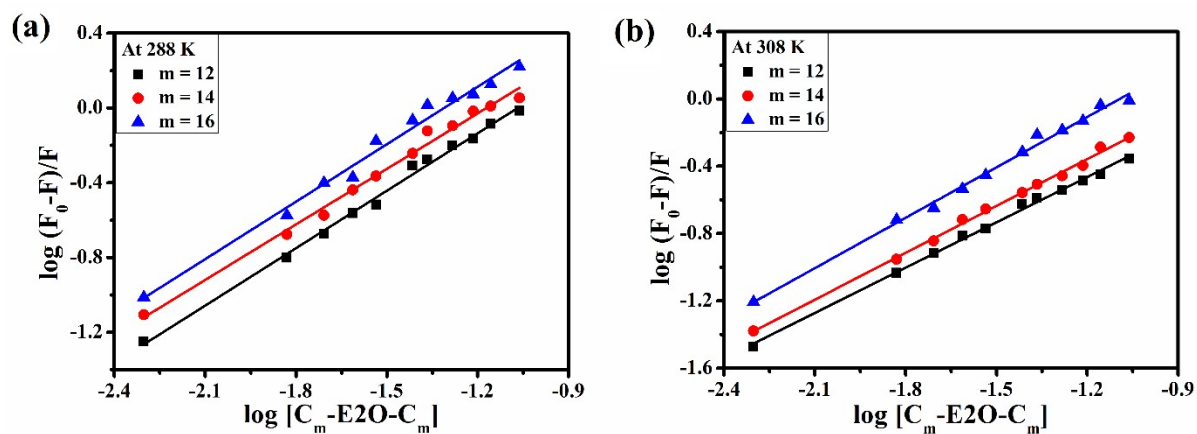

**Figure S2.** Modern Stern-Volmer plots for quenching of intrinsic fluorescence of EB-RNA complex in the presence of  $C_m$ -E2O- $C_m$  gemini surfactants ( $m = 12, 14$  and  $16$ ) in Tris-HCl buffer (pH = 7.4) at (a) 288 K and (b) 308 K.

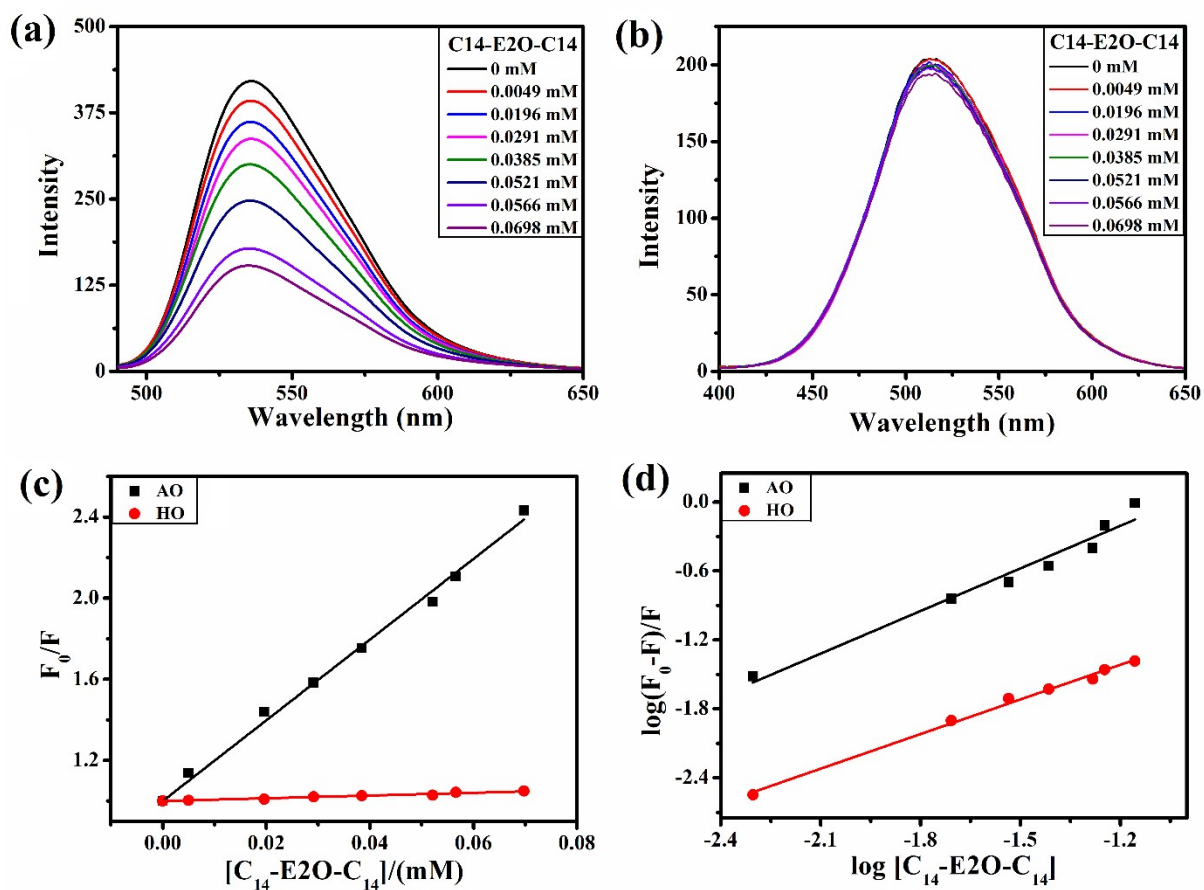

**Figure S3.** Competitive displacement assays between  $C_{14}$ -E2O- $C_{14}$  gemini surfactant and dyes. Fluorescence titration of (a) AO+RNA and (b) HO+RNA systems with varying concentrations of  $C_{14}$ -E2O- $C_{14}$  gemini surfactant. The respective Stern-Volmer and modern Stern-Volmer plots are shown in (c) and (d) (conditions: pH = 7.4, T = 298 K).

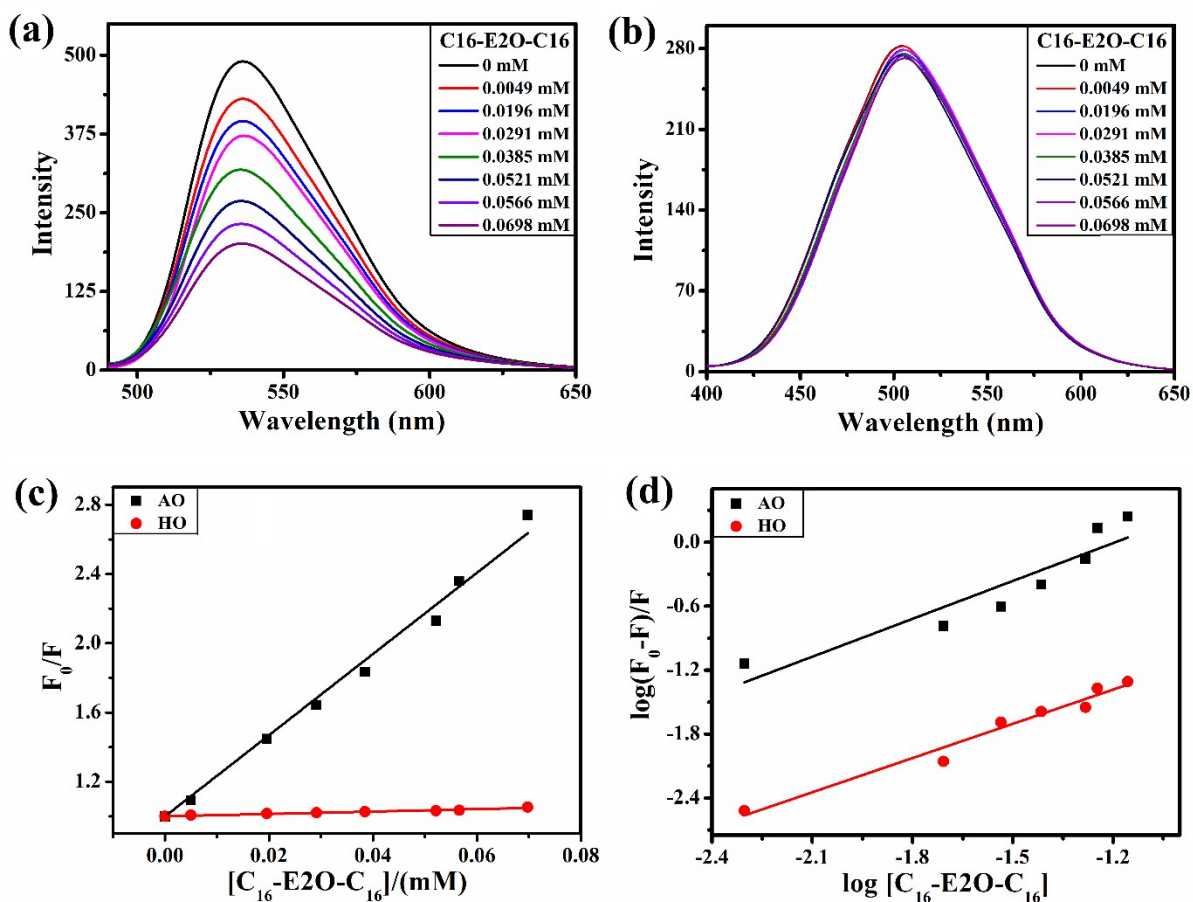

**Figure S4.** Competitive displacement assays between  $C_{16}$ -E2O- $C_{16}$  gemini surfactant and dyes. Fluorescence titration of (a) AO+RNA and (b) HO+RNA systems with varying concentrations of  $C_{16}$ -E2O- $C_{16}$  gemini surfactant. The respective Stern-Volmer and modern Stern-Volmer plots are shown in plots (c) and (d) (conditions: pH = 7.4, T = 298 K).

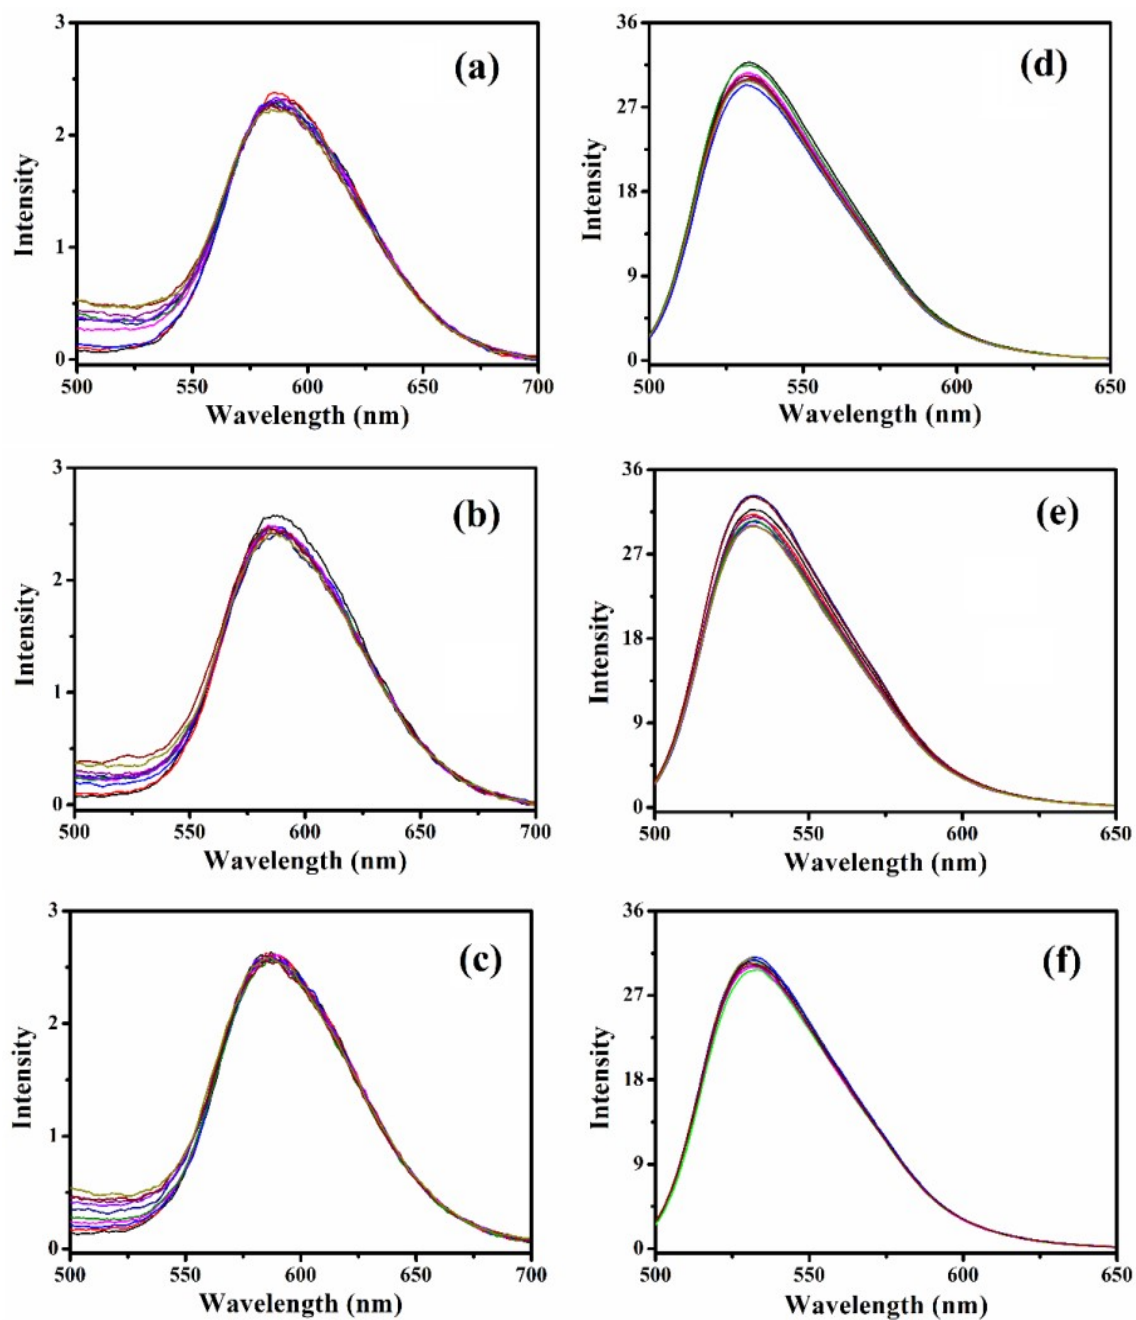

**Figure S5.** The fluorescence spectra of different intercalators ((a-c) ethidium bromide and (d-f) acridine orange) in the absence and presence of  $C_m$ -E2O- $C_m$  gemini surfactants at 298 K and pH 7.4. (a & d)  $m=12$ , (b & e)  $m=14$ , (c & f)  $m=16$ .

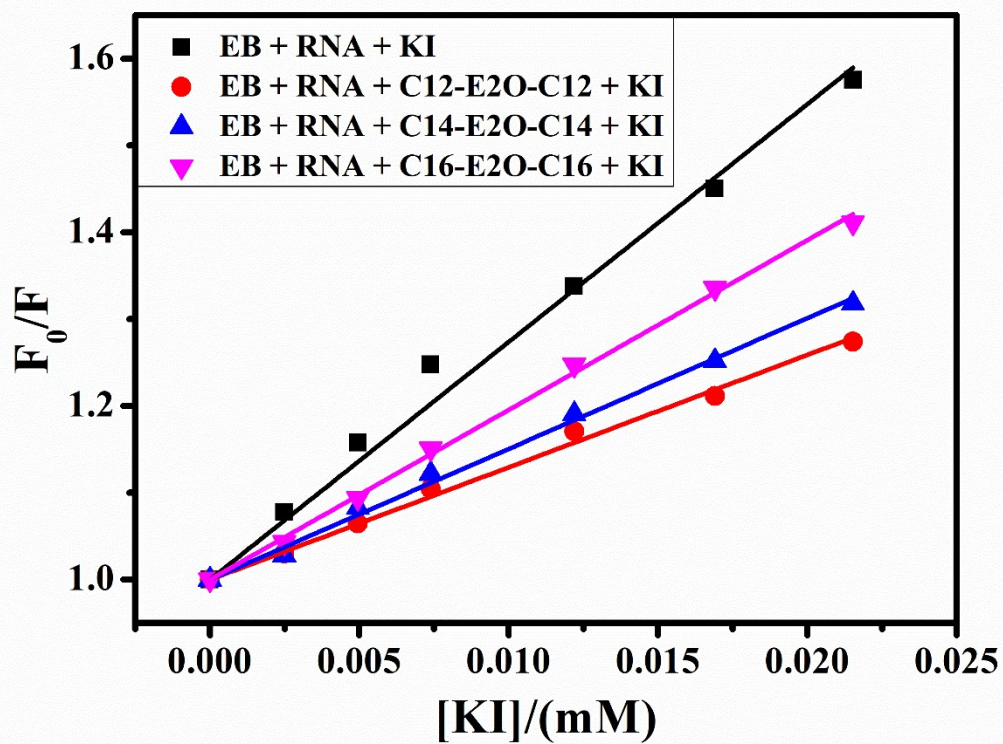

**Figure S6.** Stern-Volmer plots for KI quenching analysis of EB-RNA complex in the presence of  $C_m$ -E2O- $C_m$  gemini surfactants in Tris-HCl (pH = 7.4) at 288 K.

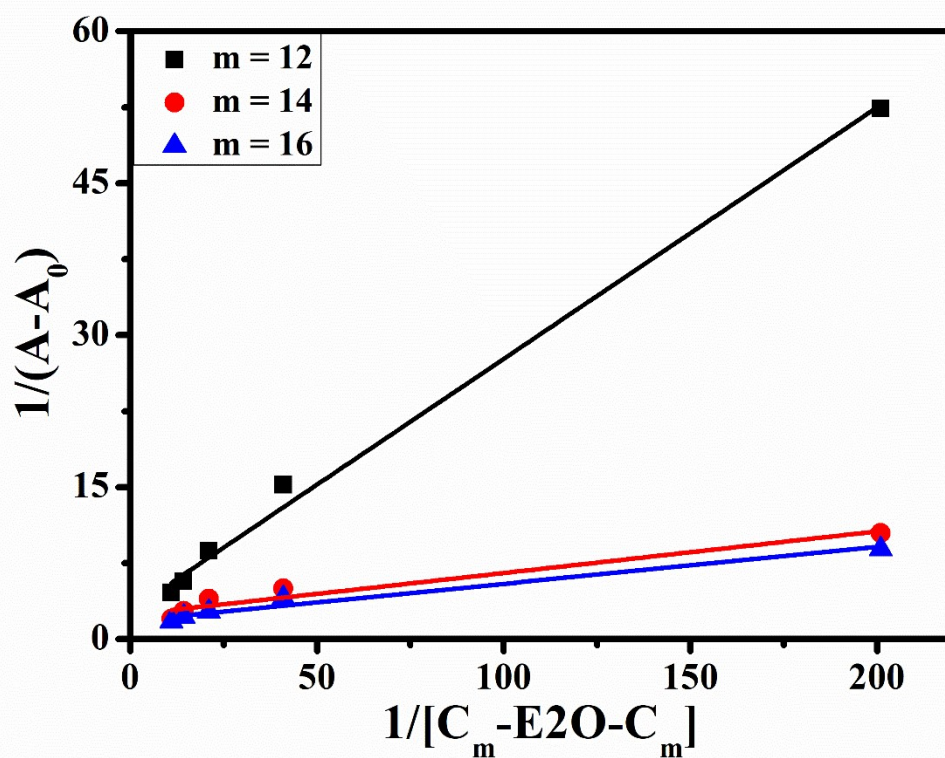

**Figure S7.** The double reciprocal plots of  $1/(A-A_0)$  versus  $1/[C_m-E2O-C_m]$  of RNA- $C_m$ -E2O- $C_m$  complexes ( $m = 12, 14$  and  $16$ ) at  $298\text{ K}$  and  $\text{pH} = 7.4$  (Tris-HCl buffer).



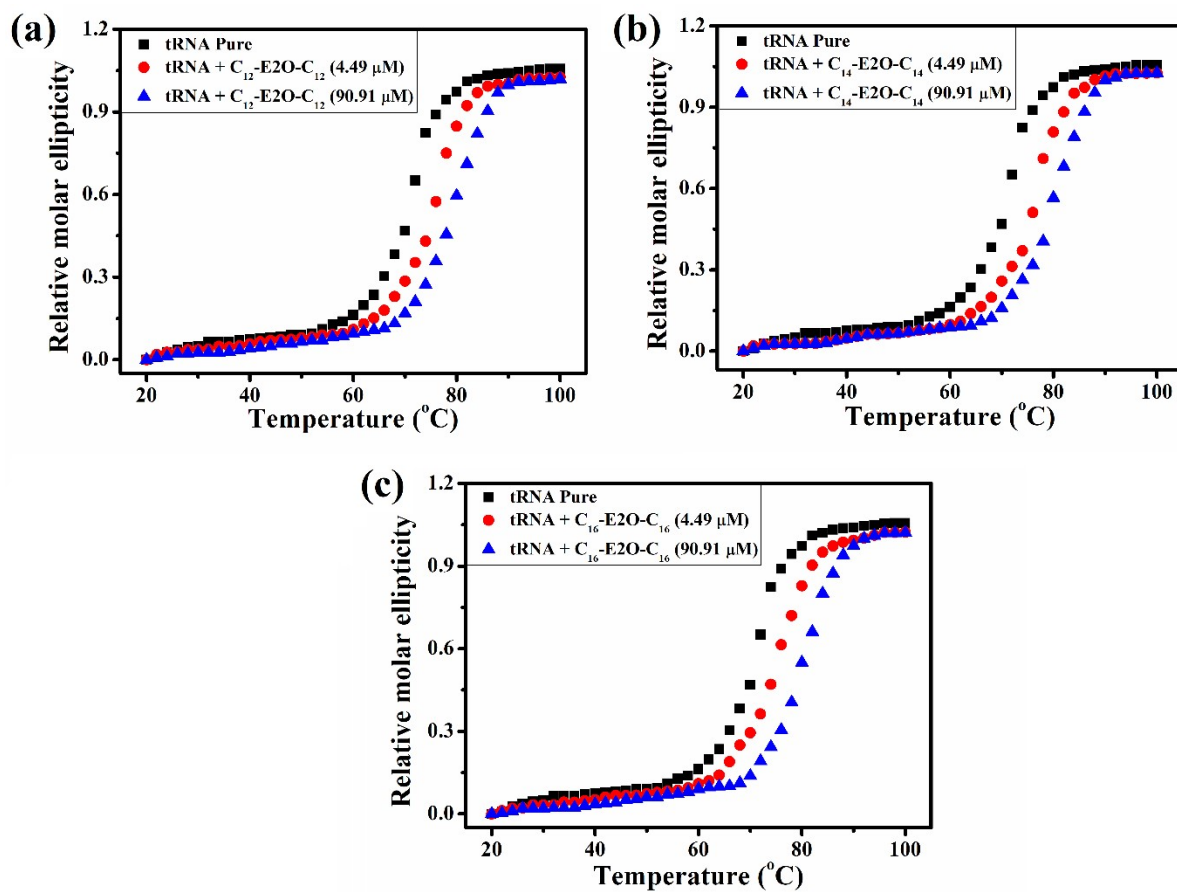

**Figure S8.** CD melting profiles of tRNA (5  $\mu\text{M}$ ) in the absence (black) and presence of (a) C<sub>12</sub>-E2O-C<sub>12</sub>, (b) C<sub>14</sub>-E2O-C<sub>14</sub>, and (c) C<sub>16</sub>-E2O-C<sub>16</sub> gemini surfactants (pre-(red) and post-CMC (blue)) in 100 mM Tris-HCl buffer (pH 7.4).

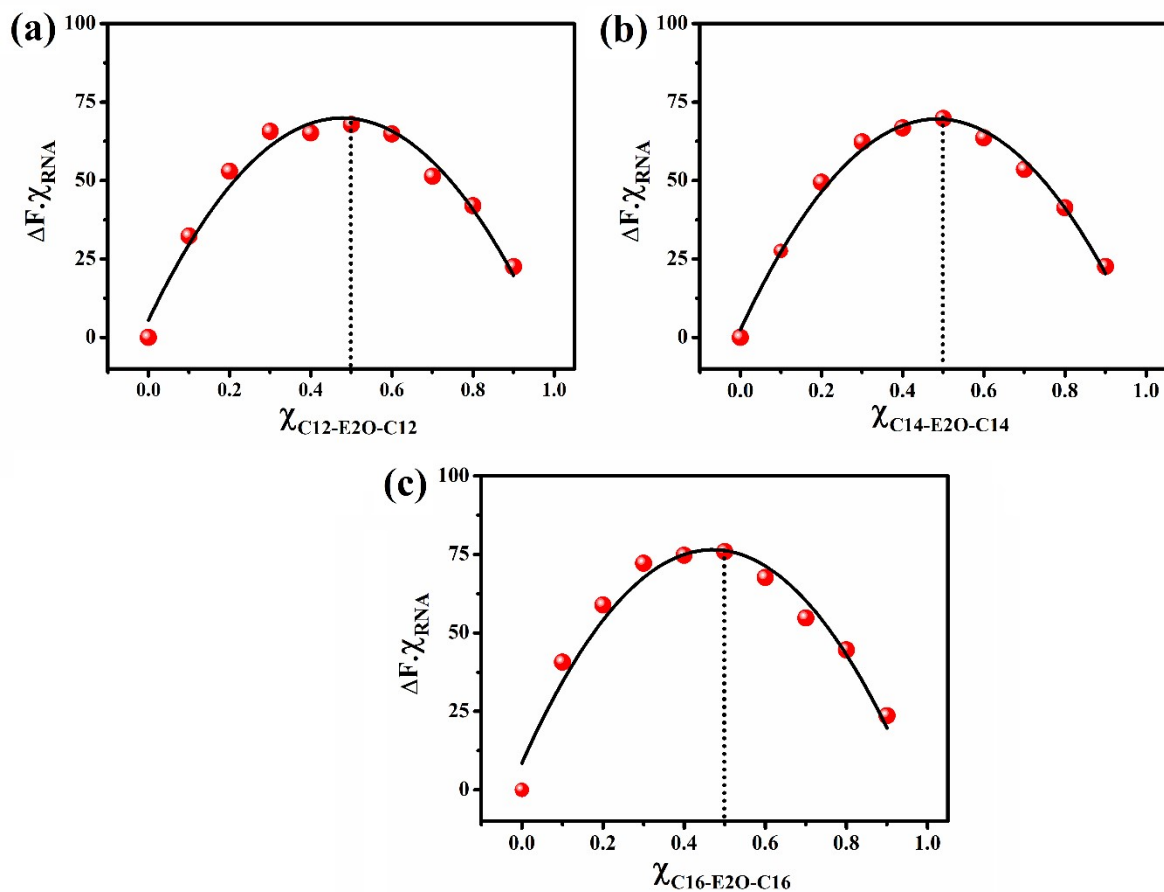

**Figure S9.** Job's plots for tRNA: $C_m$ -E2O- $C_m$  binding in Tris-HCl buffer (pH 7.4) at 298 K. The sum of the concentrations of the two components was kept constant at  $[\text{tRNA}] + [C_m\text{-E2O-}C_m] = 10 \mu\text{M}$ . Fluorescence emission were recorded at excitation of 473 nm.

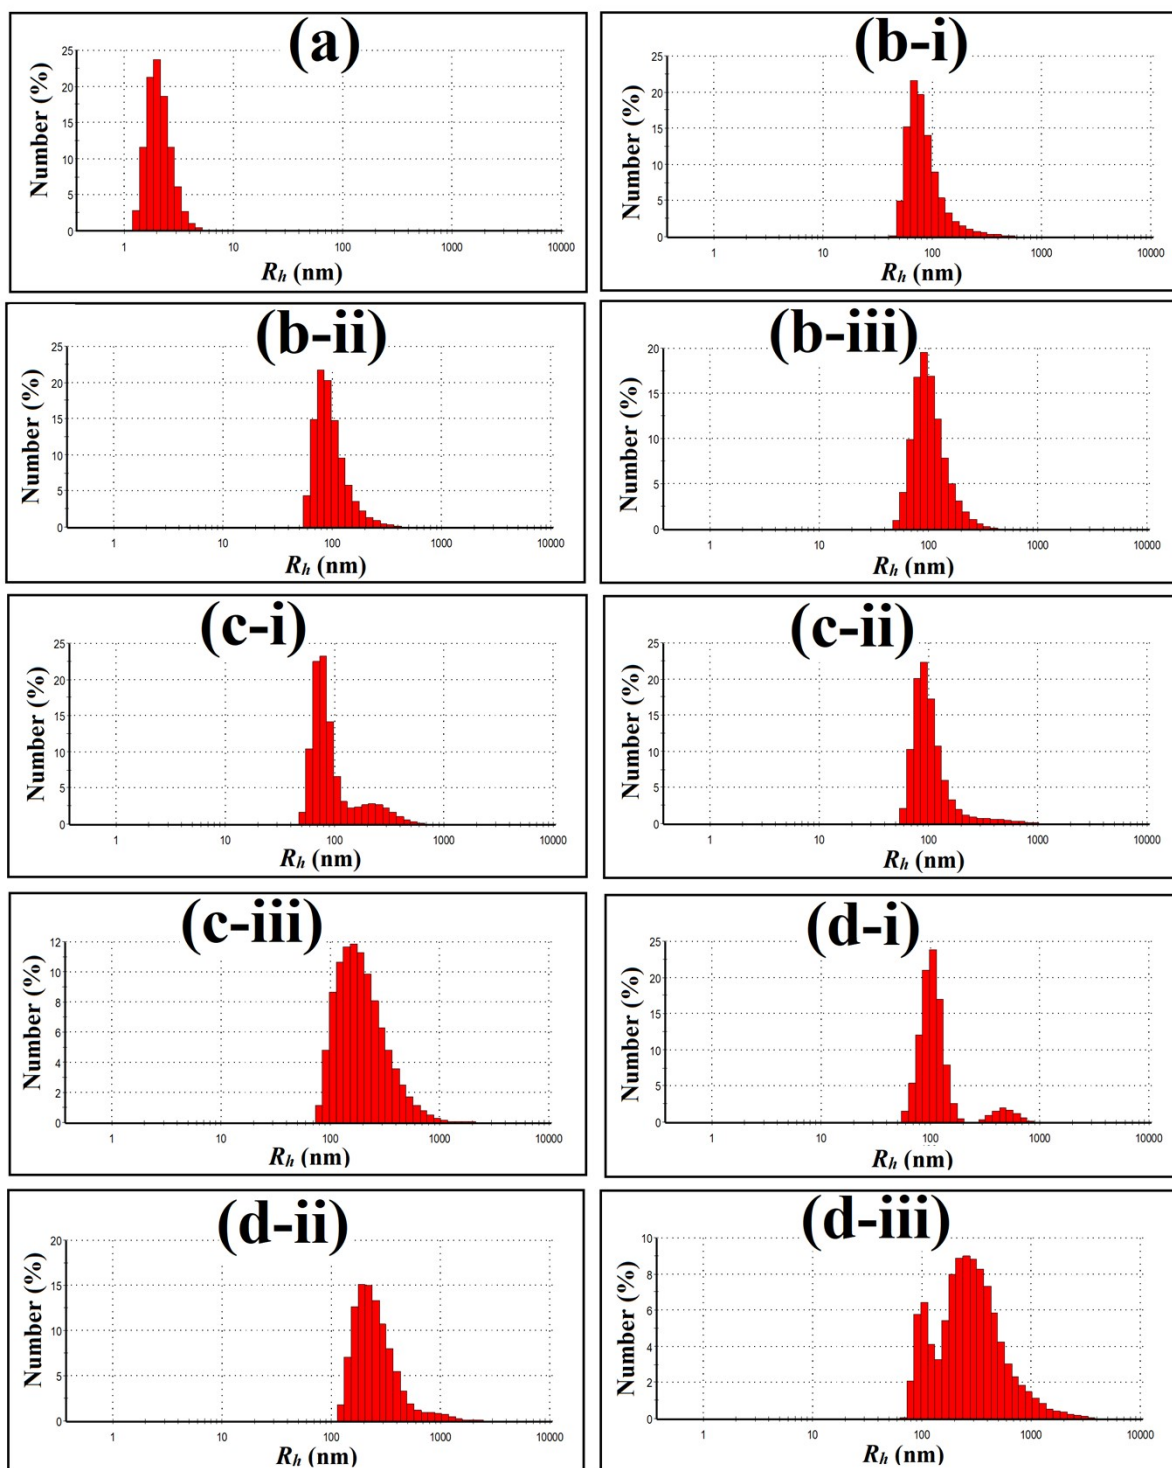

**Figure S10.** Dynamic light scattering results of tRNA- $C_m$ -E2O- $C_m$  complexes. Hydrodynamic radii ( $R_h$ ) of tRNA ( $5 \mu\text{M}$ ) in the absence (a) and presence (b-d) of  $C_m$ -E2O- $C_m$  gemini surfactants at different concentrations ((i) =  $4.96 \mu\text{M}$ , (ii) =  $24.39 \mu\text{M}$ , (iii) =  $47.62 \mu\text{M}$ ).

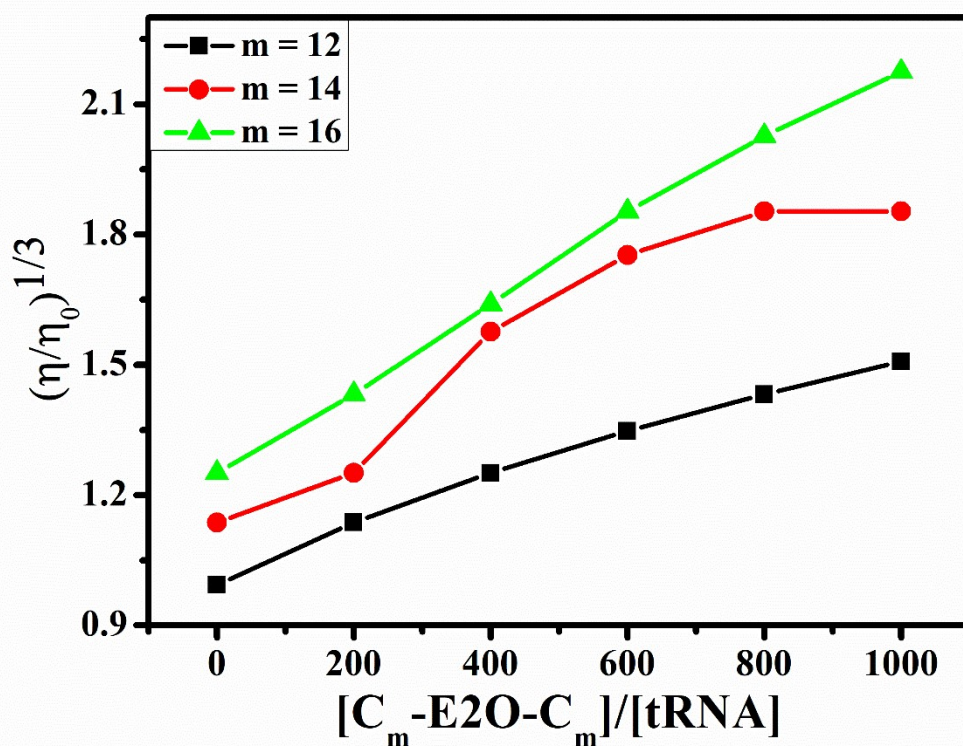

**Figure S11.** The viscosity graphs of tRNA at different concentrations of  $C_m$ -E2O- $C_m$  gemini surfactants ( $m = 12, 14$  and  $16$ ) at 298 K and pH = 7.4 (Tris-HCl buffer).

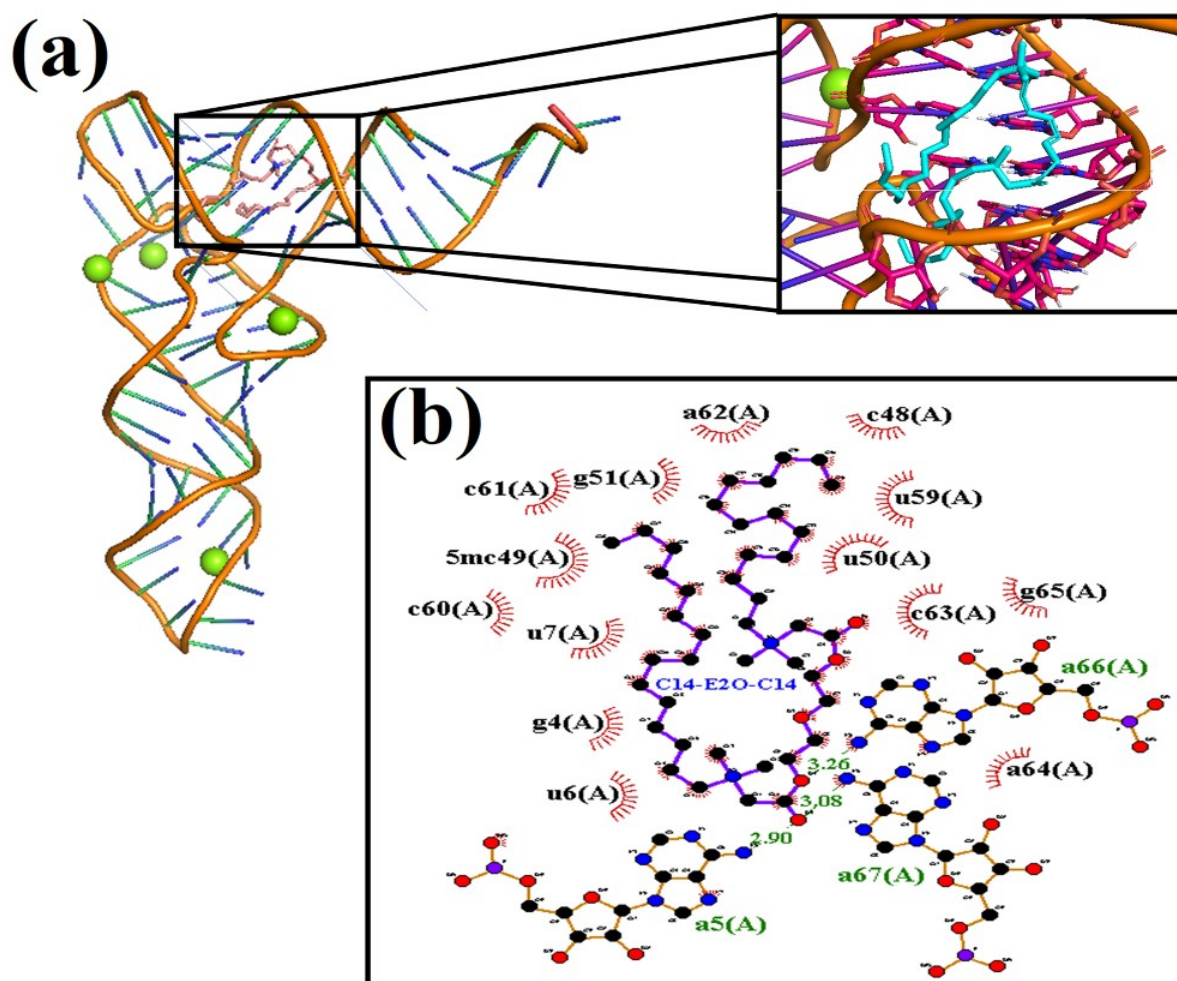

**Figure S12.** (a) Molecular docking view of binding of C<sub>14</sub>-E2O-C<sub>14</sub> gemini surfactants with tRNA, (inset) depiction of an enlarged view, and (b) 2-D view of involved molecular interactions (black color residues- hydrophobic interactions, green residues- hydrogen bonding).

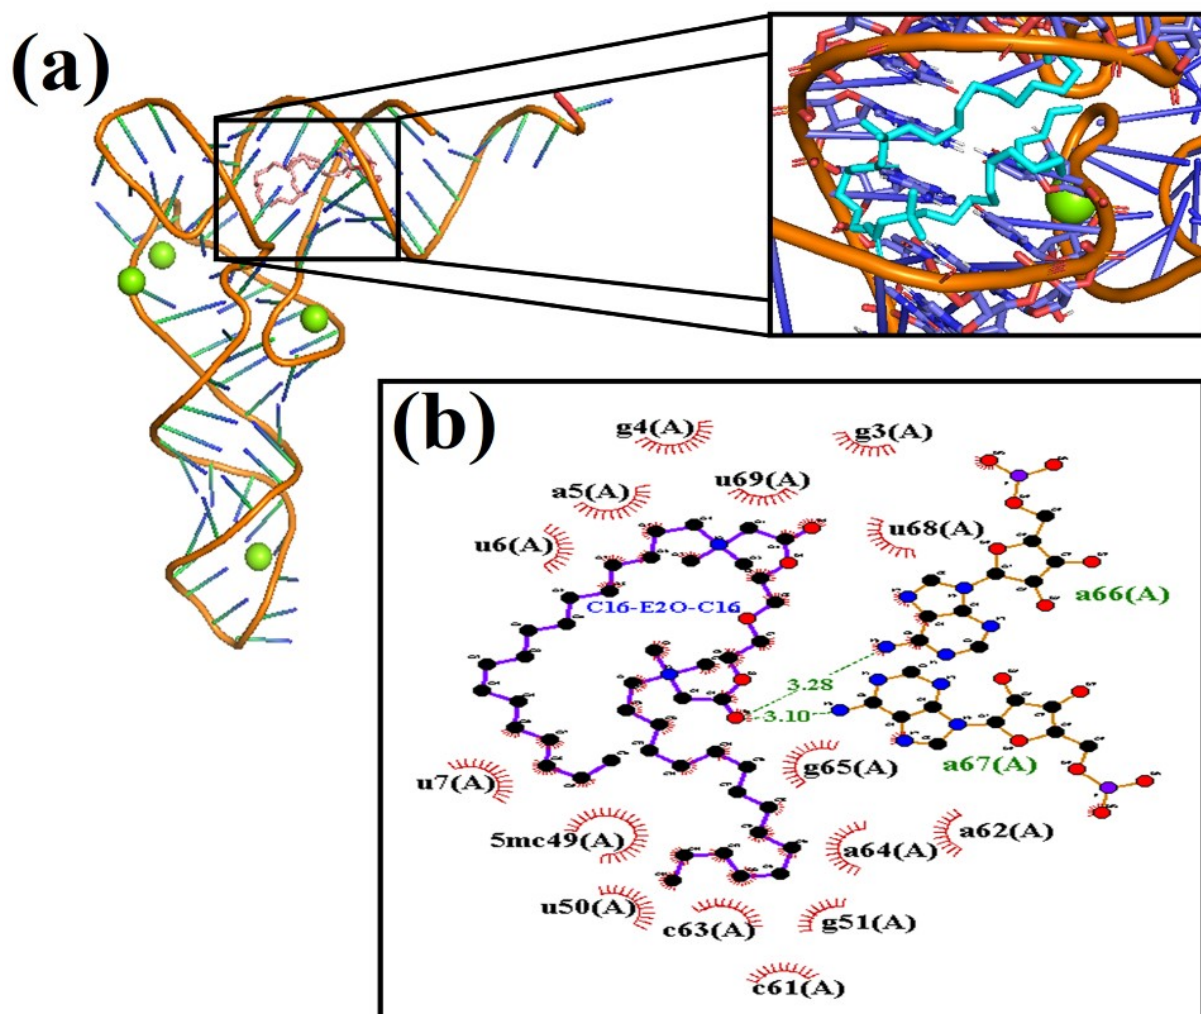

**Figure S13.** (a) Molecular docking view of binding of  $C_{16}$ -E2O- $C_{16}$  gemini surfactants with tRNA, (inset) depiction of an enlarged view, and (b) 2-D view of involved molecular interactions (black color residues- hydrophobic interactions, green residues- hydrogen bonding).

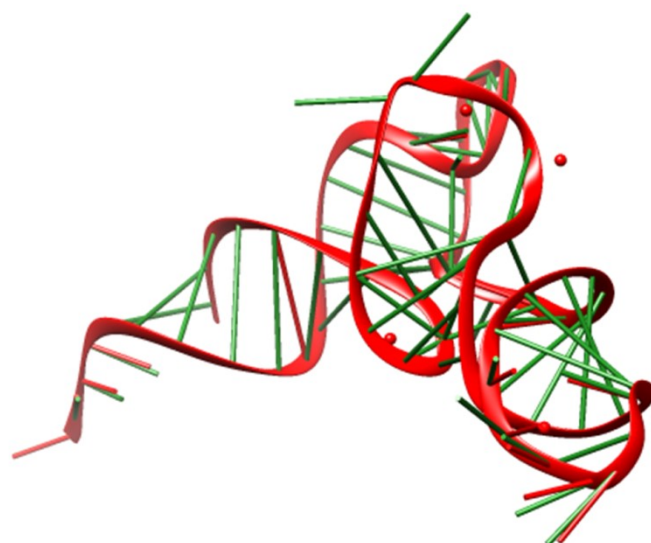

**Figure S14.** Superimposed structure of unbounded tRNA (red) and tRNA after simulation (green).

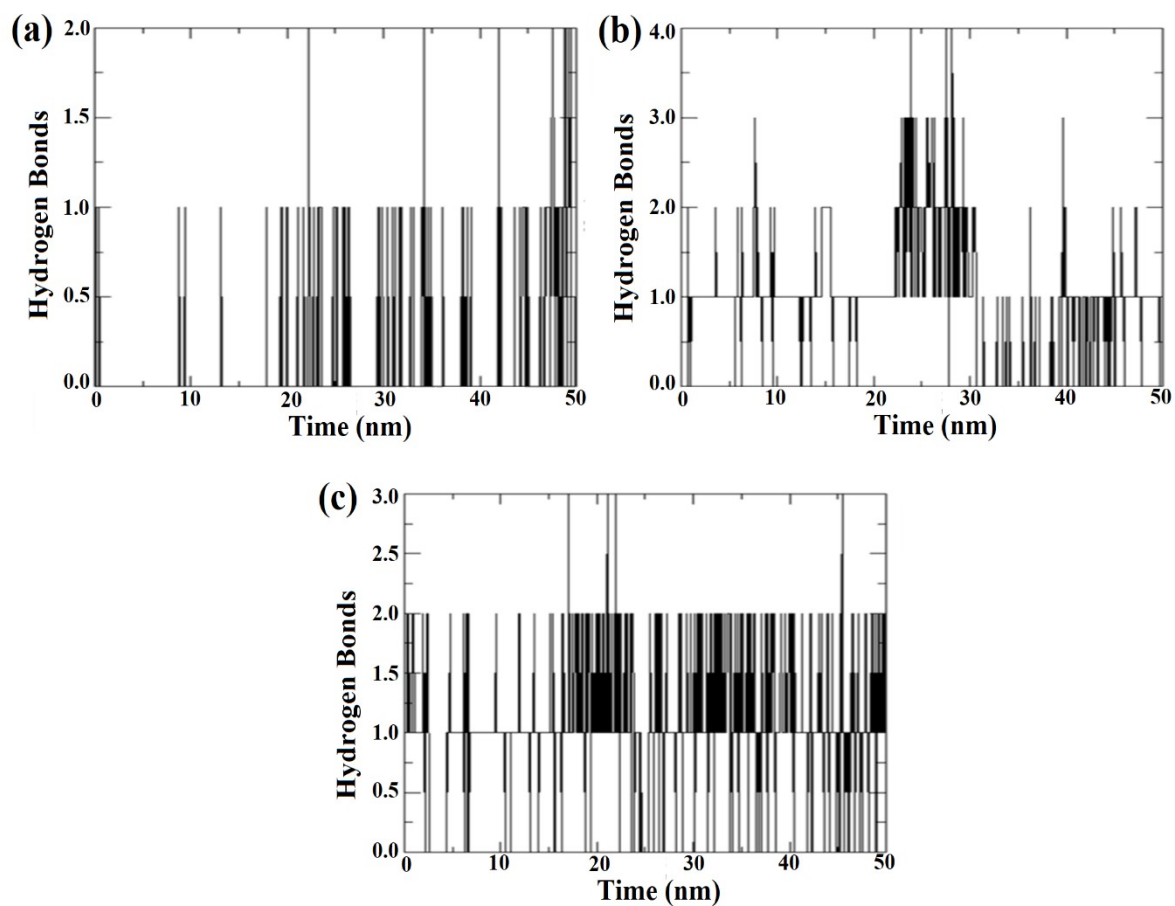

**Figure S15.** Number of average hydrogen bonding interactions between tRNA-C<sub>m</sub>-E2O-C<sub>m</sub> complexes (m = 12 (a), 14 (b) and 16 (c)) during 50 ns simulation time.



**Table S1.** Parameters obtained in KI quenching at 298 K and pH = 7.4 (Tris-HCl buffer).

| Gemini Surfactant                    | $K_{SV}(\times 10^3 \text{ M}^{-1})$ | $R^2$ |
|--------------------------------------|--------------------------------------|-------|
| C <sub>12</sub> -E2O-C <sub>12</sub> | 6.69                                 | 0.99  |
| C <sub>14</sub> -E2O-C <sub>14</sub> | 8.26                                 | 0.99  |
| C <sub>16</sub> -E2O-C <sub>16</sub> | 13.97                                | 0.99  |

**Table S2.** Estimated binding constants, free energy changes and adjusted coefficients of determination for the RNA-C<sub>m</sub>-E2O-C<sub>m</sub> complexation from electronic absorption studies (T = 298 K, pH = 7.4).

| Gemini Surfactant                    | $K_b (\times 10^3 \text{M}^{-1})$ | $\Delta G_b^0 (\text{kJmol}^{-1})$ | R <sup>2</sup> |
|--------------------------------------|-----------------------------------|------------------------------------|----------------|
| C <sub>12</sub> -E2O-C <sub>12</sub> | 11.4                              | -23.15                             | 0.99           |
| C <sub>14</sub> -E2O-C <sub>14</sub> | 48.95                             | -26.75                             | 0.97           |
| C <sub>16</sub> -E2O-C <sub>16</sub> | 58.59                             | -27.21                             | 0.98           |

**Table S3(a).** Docking log file of RNA-C<sub>12</sub>-E2O-C<sub>12</sub> complex (saving top 9 orientations)

$$E_{\min} = -5.2 \text{ kcal/mol}$$

| mode | affinity   | dist from best mode |          |
|------|------------|---------------------|----------|
|      | (kcal/mol) | rmsdl.b.            | rmsdu.b. |
| 1    | -5.2       | 0.000               | 0.000    |
| 2    | -5.0       | 6.283               | 11.641   |
| 3    | -4.9       | 2.413               | 4.772    |
| 4    | -4.8       | 5.912               | 10.260   |
| 5    | -4.8       | 2.565               | 4.995    |
| 6    | -4.7       | 6.066               | 10.548   |
| 7    | -4.7       | 2.441               | 8.220    |
| 8    | -4.7       | 36.554              | 41.526   |
| 9    | -4.7       | 5.936               | 10.408   |

**Table S3(b).** Docking log file of RNA-C<sub>14</sub>-E2O-C<sub>14</sub> complex (saving top 9 orientations)

$$E_{\min} = -5.4 \text{ kcal/mol}$$

| mode | affinity   | dist from best mode |          |
|------|------------|---------------------|----------|
|      | (kcal/mol) | rmsdl.b.            | rmsdu.b. |
| 1    | -5.4       | 0.000               | 0.000    |
| 2    | -5.3       | 2.734               | 5.298    |
| 3    | -5.2       | 2.093               | 6.465    |
| 4    | -5.2       | 29.831              | 34.695   |
| 5    | -5.1       | 2.282               | 6.988    |
| 6    | -5.1       | 2.581               | 4.492    |
| 7    | -5.1       | 4.429               | 7.676    |
| 8    | -5.1       | 3.510               | 10.147   |
| 9    | -5.0       | 3.248               | 8.869    |

**Table S3(c).** Docking log file of RNA-C<sub>16</sub>-E2O-C<sub>16</sub> complex (saving top 9 orientations)

$$E_{\min} = -5.7 \text{ kcal/mol}$$

| Mode | affinity   | dist from best mode |          |
|------|------------|---------------------|----------|
|      | (kcal/mol) | rmsdl.b.            | rmsdu.b. |
| 1    | -5.7       | 0.000               | 0.000    |
| 2    | -5.5       | 3.247               | 7.575    |
| 3    | -5.4       | 3.478               | 7.962    |
| 4    | -5.2       | 5.772               | 9.764    |
| 5    | -5.1       | 3.288               | 7.808    |
| 6    | -5.1       | 6.171               | 10.185   |
| 7    | -5.0       | 3.911               | 7.720    |
| 8    | -5.0       | 4.588               | 8.839    |
| 9    | -5.0       | 3.132               | 7.861    |
